# Supplementary material for: Expansion-assisted selective plane illumination microscopy for nanoscale imaging of centimeter-scale tissues
Source: eLife. 2025 Jun 30;12:RP91979. doi: 10.7554/eLife.91979 (PMC12208669; doi:10.7554/eLife.91979)
Supplement: Supplementary file 2. [file elife-91979-supp2.xlsx]

## Sheet: Supplementary File 2a
Reference	Name	Liquid immersion	f (mm)	NA	Field of view (mm)	Etendue (mm2)	Working distance (mm)
Tang et al. 2024	Curved LSFM	1.33 - 1.56	118	0.25	13	8.3	20
Current study	ExA-SPIM	1.33 - 1.56	100	0.31	16.4	19.65	40
Fan et al. 2019	RUSH	-	-	0.35	14	18.86	19
Ota et al. 2020	FASHIO-2PM	-	35	0.4	4.24	2.26	4.5
McConnell et al. 2016	Mesolens	1.33 - 1.56	50	0.47	6	1.13	3
Yu et al. 2024	Cousa	-	20	0.5	2	0.79	20
Yu et al. 2021	Diesel2P	-	30	0.54	6	8.24	8
Kyocera	CS06-10-40-154	1.52 - 1.56	18	0.6	2	1.13	40.6
Sofroniew et al. 2016	2p-RAM	-	21	0.6	5	7.07	2.7
Voigt et al. 2024	Schmidt	1.33 - 1.56	-	1	1.15	1.04	11

## Sheet: Supplementary File 2b
Reference	Imaging method	Optical resolution (μm)	Voxel size (μm)	Isotropy	Focal volume (μm3)	Voxel rate (106 voxels/sec)
Economo et al. 2016	2p tomography	0.45×0.45×1.33	0.30×0.30×1.00	2.96:1	0.27	16
Gong et al. 2016	fMOST	0.32×0.32×2.00	0.32×0.32×2.00	6.25:1	0.2	4
Narashimhan et al. 2017	Oblique light-sheet	0.75×0.75×6.90	0.41×0.41×0.41	9.20:1	3.88	419
Migliori et al. 2018	Light-sheet theta	0.34×0.34×3.00	0.23×0.23×5.00	8.82:1	0.29	105
Chakraborty et al. 2019	Axially-swept SPIM	0.48×0.48×0.48	0.16×0.16×0.16	01:01:00	0.11	42
Voleti et al. 2019	SCAPE 2.0	0.60×1.21×1.55	0.24×0.24×0.24	2.58:1	1.13	419
Gao et al. 2019	ExLLSM	0.06×0.06×0.09	0.03×0.03×0.04	1.5:1	<<0.01	68
Chen et al. 2020	Multifocal 2p tomography	0.36×0.36×2.59	0.40×0.40×1.00	7.19:1	0.34	77
Guo et al. 2020	Dual-inverted SPIM	0.48×0.48×0.48	0.24×0.24×0.24	01:01:00	0.11	419
Chen etl al. 2020	Tiling SPIM	0.30×0.30×2.50	0.30×0.30×1.50	05:01:00	0.22	105
Wang et al. 2021	fMOST	0.34×0.34×2.00	0.23×0.23×1.00	5.88:1	0.23	136
Zhang et al. 2021	Axially-swept SPIM	0.95×0.95×2.10	0.52×0.52×1.00	2.21:1	1.9	84
Xu et al. 2021	VISOR2 SPIM	1.00×1.00×2.50	1.00×1.00×2.50	2.5:1	2.5	373
Glaser et al. 2022	Open-top light-sheet	0.45×0.45×2.91	0.20×0.20×0.20	6.47:1	0.59	105
Xiaoli Qi et al. 2023	Confocal airy light-sheet	0.76×0.76×2.20	0.26×0.26×1.06	2.08:1	1.27	419
Vladimirov et al. 2024	Benchtop mesoSPIM	1.50×1.50×3.30	0.75×0.75×2.00	2.2:1	7.43	37
Tang et al. 2024	Curved LSFM	1.22×1.22×2.50	0.63×0.63×1.25	02:01:00	3.72	130
Current study	ExA-SPIM (1×)	1.00×1.00×3.00	0.75×0.75×1.00	03:01:00	6.75	725
Current study	ExA-SPIM (2×)	0.50×0.50×1.50	0.38×0.38×0.50	03:01:00	0.84	725
Current study	ExA-SPIM (3×)	0.33×0.33×1.00	0.25×0.25×0.33	03:01:00	0.25	725
Current study	ExA-SPIM (4×)	0.25×0.25×0.75	0.19×0.19×0.25	03:01:00	0.11	725
*Note, only modalities capable of providing ≤1.5 μm lateral optical resolution are included

## Sheet: Supplementary File 2c
Manufacturer	Model	Magnification (×)	NA	Lateral resolution (μm)	Field of view (mm)	Etendue (mm2)	Speed (cm3/day)
Schneider-Kreuznach	VEO_JM DIAMOND 1.43×/F3.0	1.43	0.1	3.05	57.34	26.34	2137
Schneider-Kreuznach	VEO_JM DIAMOND 1.67×/F3.0	1.67	0.1	3.05	49.1	19.32	1340
Schneider-Kreuznach	VEO_JM DIAMOND 2.5×/F2.6	2.5	0.13	2.35	32.8	15.17	400
Schneider-Kreuznach	VEO_JM DIAMOND 3.33×/F2.1	3.33	0.18	1.69	24.62	15.43	170
Schneider-Kreuznach	VEO_JM DIAMOND 5.0×/F1.3	5	0.31	1	16.4	19.65	50
Nikon	Rayfact 1.4S	1.4	0.11	2.77	61.71	36.19	2277
Nikon	Rayfact 1.7S	1.7	0.11	2.77	49.37	23.16	1272
Nikon	Rayfact 2.5S	2.5	0.14	2.18	34.56	18.39	400
Nikon	Rayfact 3.5S	3.5	0.16	1.91	24.69	12.25	146
Nikon	Rayfact 5S	5	0.17	1.79	17.28	6.78	50
Nikon	Rayfact 1-2x Variable Lens	1	0.09	3.39	86.4	47.49	6249
Nikon	Rayfact 1-2x Variable Lens	2	0.12	2.54	43.2	21.11	781
Nikon	Rayfact 2-5x Variable Lens	2	0.13	2.35	43.2	24.77	781
Nikon	Rayfact 2-5x Variable Lens	5	0.17	1.79	16.6	6.25	50
